# Supplementary material
Source: PubMed Central journal article supplement (PMC6646068)

**eFigure 1: CONSORT Flow Diagram**

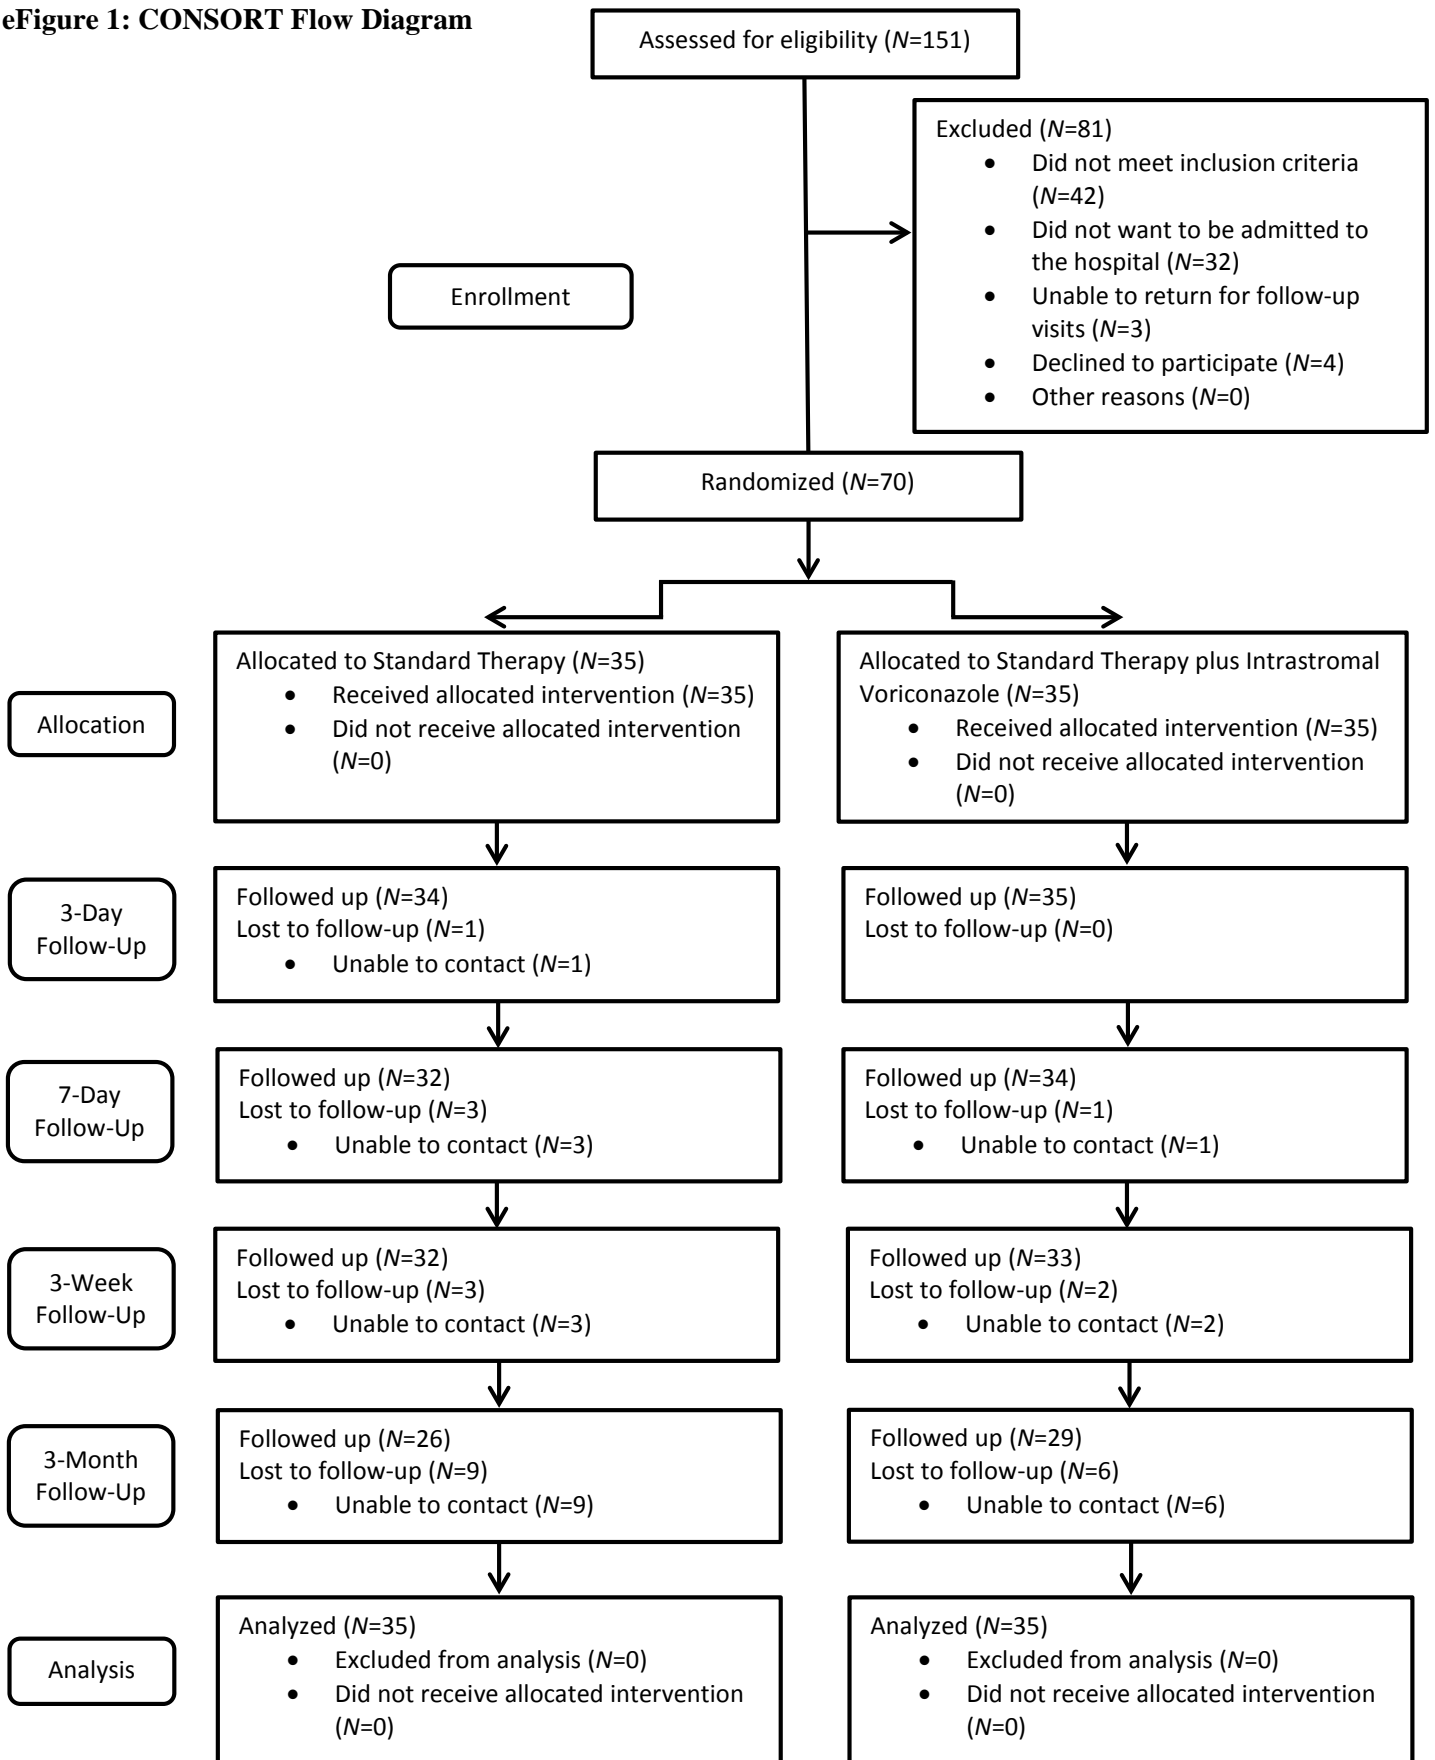

Supplement: NIHMS1529089-supplement-1.pdf [file NIHMS1529089-supplement-1.pdf]
